# Supplementary material
Source: PubMed Central journal article supplement (PMC5228566)
Supplement: NIHMS839546-supplement-1.pdf [file NIHMS839546-supplement-1.pdf]

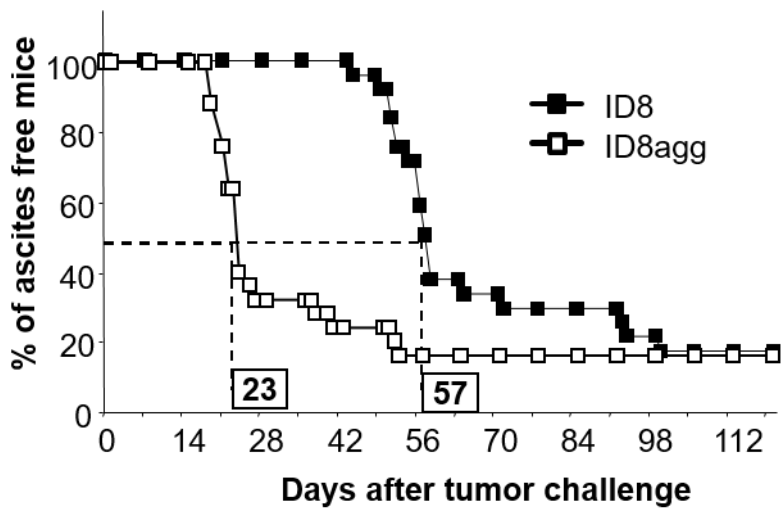

**Suppl. Fig. 1. Aggressive variant of ID8 murine ovarian cancer.** We generated an aggressive ID8 line, ID8agg, by serial passage through WT hosts. Numbers in boxes indicate median cohort time to ascites development.

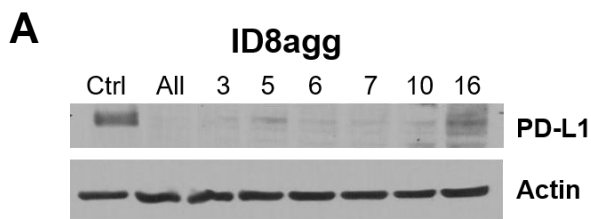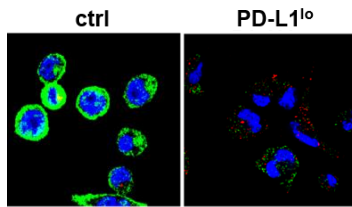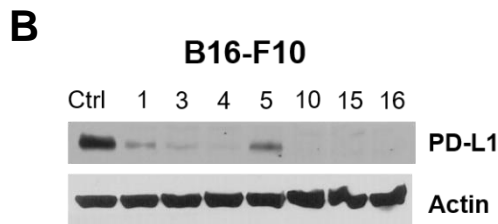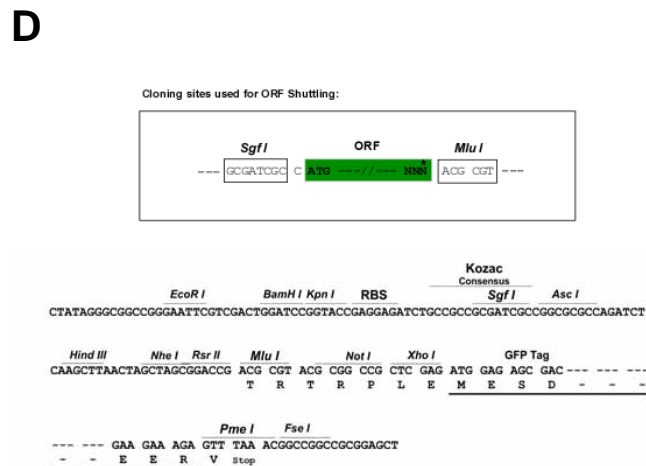

**C**

**PD-L1ShRNA target sequence:**  
CCGGCGAATTACTGTGAAAGTCAATCTCGAGAT  
TGACTTTTCACAGTAATTCGTTTTTG.

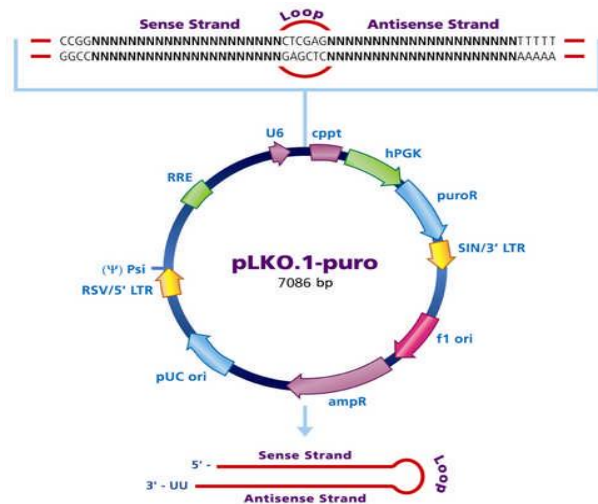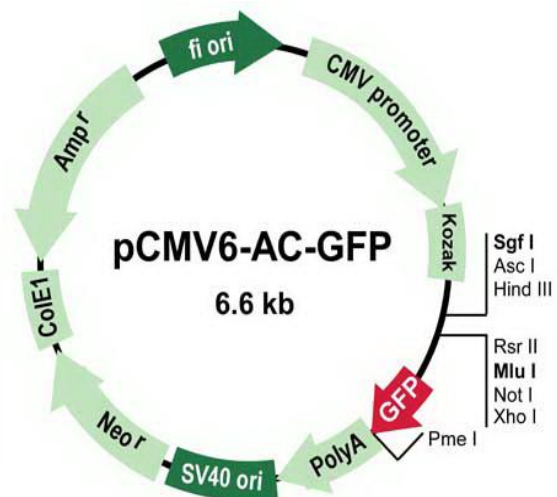

**Suppl. Fig. 2. Genetic knock down of PD-L1 in ID8agg ovarian cancer and B16 melanoma cells using shRNA.** We used plasmids stably expressing shRNA to reduce basal and PD-L1 expression (PD-L1<sup>lo</sup>) in ID8agg (**A**) and B16 (**B**) cells, and a constitutively active vector to increase PD-L1 expression in B16 (PD-L1<sup>hi</sup>, not shown). Confocal microscopy in **A** shows PD-L1 (green) and LC3 (red) in ID8agg. **C**. Stable PD-L1 knockdown in B16 and ID8agg lines was generated using lentivirus transduction particles containing validated PD-L1 shRNA (Sigma, TRCN0000068001) against murine *Pdcd1lg1* in pLKO.1-puro vector using puromycin selection per manufacturer's protocol **D**. The PD-L1-overexpressing (PD-L1<sup>hi</sup>) B16 polyclonal line was generated by transfection of pCMV6-PD-L1-GFP plasmid (OriGene, MG203953) using Turbofect (ThermoFisher) per the manufacturer's protocol.

**A**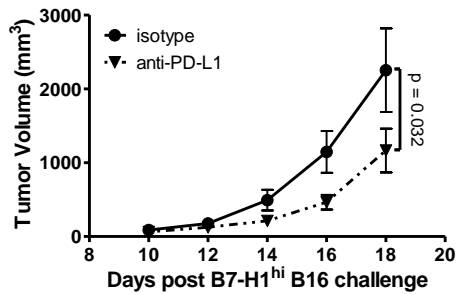**B**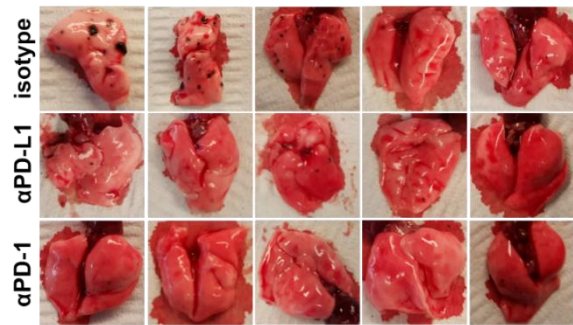

**Suppl. Fig. 3. αPD-L1 reduces tumor growth and metastatic spread in NSG mice.**

**A.** NSG mice challenged subcutaneously with PD-L1<sup>hi</sup> B16 cells and treated with αPD-L1 200 μg every other day starting one day following challenge. p-value, two-way ANOVA.

**B.** Photos of representative lungs showing primary B16 metastases (black) from NSG mice challenged subcutaneously with parental B16 and sacrificed on day 18. αPD-L1 or αPD-1 or respective isotype controls given as in panels for **Fig. 2 B,C**.

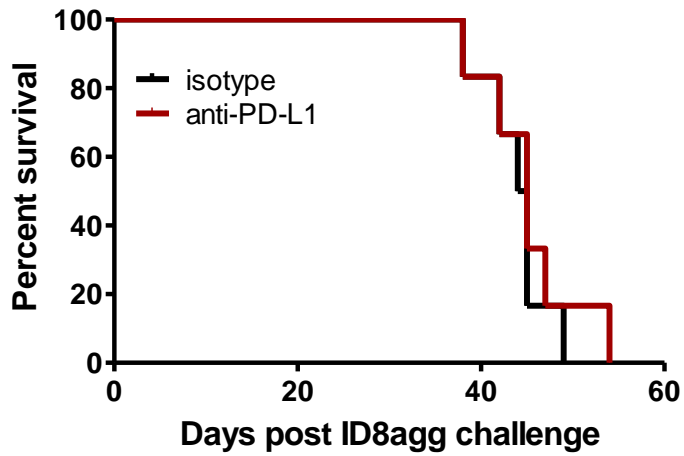

**Suppl. Fig. 4.  $\alpha$ PD-L1 immunotherapy fails to treat ID8agg in wild-type mice.** WT mice were challenged with ID8agg cells and treated with anti-PD-L1 (100  $\mu$ g/mouse) every 5 days starting day 7 following ID8agg challenge. PD-L1 KO mice were challenged with either control (**B**) or PD-L1<sup>lo</sup> (**C**) B16 cells and treated with anti-PD-L1 (100  $\mu$ g/mouse) every 5 days starting day 7 following B16 challenge.

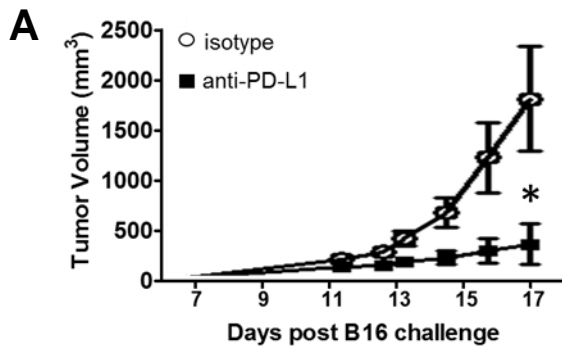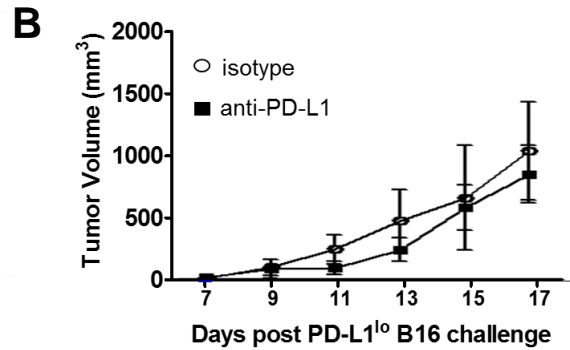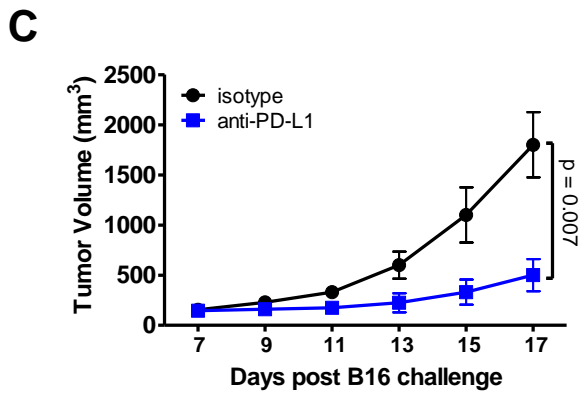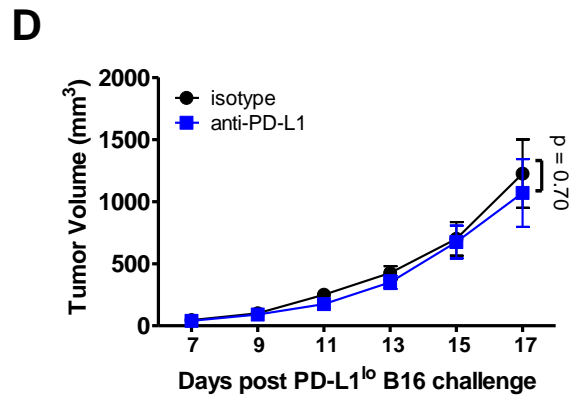

**Suppl. Fig. 5. Tumor PD-L1 is necessary and sufficient for  $\alpha$ PD-L1 treatment effects.** WT mice were challenged with either control (A) or PD-L1<sup>lo</sup> (B) B16 cells and treated with anti-PD-L1 (100  $\mu$ g/mouse) every 5 days starting day 7 following B16 challenge. PD-L1 KO mice were challenged with either control (C) or PD-L1<sup>lo</sup> (D) B16 cells and treated as in A,B.

**A**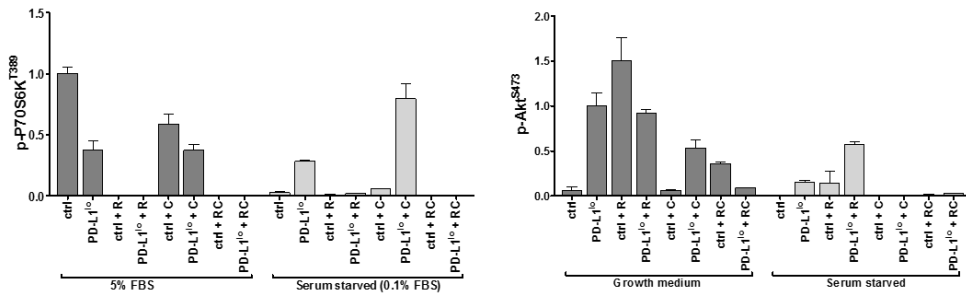**B**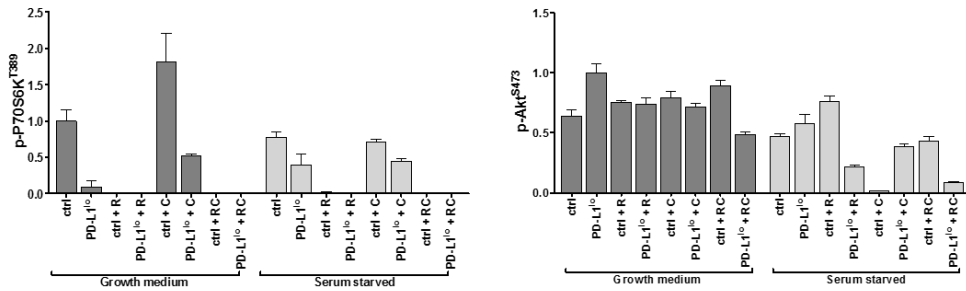

**Suppl. Fig. 6. P70S6K<sup>T389</sup> and Akt<sup>S478</sup> signaling in ID8agg ovarian cancer and B16 melanoma cells under distinct conditions.** Summary data of Western blots for P70S6K<sup>T389</sup> and Akt<sup>S473</sup> as ratios of phospho-protein/total protein under basal or serum starved (24 h) conditions for ID8agg (**A**) and B16 (**B**) cells and pre-treatment with rapamycin (R) for 16 h, chloroquine (C) for 6 h or both (R+C). Means from 3 independent blots shown.

**A**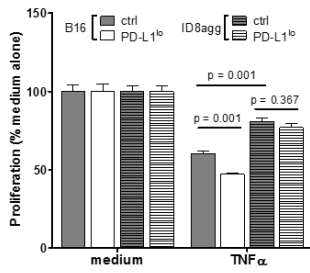**B**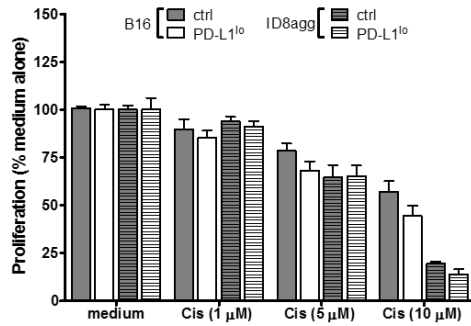**C**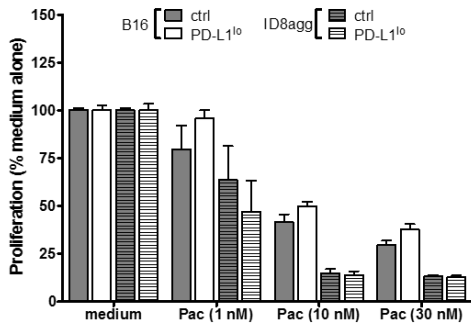

**Suppl. Fig. 7. Effect of tumor cell PD-L1 expression on proliferation sensitivity to TNF $\alpha$  and chemotherapy.** **A.** Proliferation *in vitro* of B16 cells  $\pm$  TNF $\alpha$  (10 ng/mL) determined by MTT versus control (ctrl, set at 100%). p-value, unpaired *t* test. **B.** Proliferation *in vitro* of B16 cells  $\pm$  cisplatin (**B**) or paclitaxel (**C**) at indicated dose, as in **A**.
